# Supplementary material for: Seroprevalence of anti-SARS-CoV-2 antibodies in a cohort of New York City metro blood donors using multiple SARS-CoV-2 serological assays: Implications for controlling the epidemic and “Reopening”
Source: PLoS One. 2021 Apr 28;16(4):e0250319. doi: 10.1371/journal.pone.0250319 (PMC8081167; doi:10.1371/journal.pone.0250319)
Supplement: S1 Data — (XLSX) [file pone.0250319.s002.xlsx]

## Sheet: S1 Data
Sample ID	Gender	Age Decade	Race	Zip Code	Ortho Result	Ortho Score	Abbott Result	Abbott Score	S1 Repeat (ug/mL)	NP (ng/mL)	Neutralizing Result	Neutralization Titer (NT100)
40	Female	40	HISPANIC/LATINO	10451	Reactive	120	Positive	2.49	68.3217	86.7819	Negative	< LOD
60	Female	60	BLACK	07112	Reactive	1000	Positive	3.6	307.575	466.926	Positive	160
40	Female	40	HISPANIC/LATINO	10451	Reactive	438	Positive	3.45	108.391	149.711	Positive	80
20	Female	20	HISPANIC/LATINO	11101	Reactive	654	Positive	2.07	119.961	74.8761	Positive	80
60	Female	60	WHITE	11746	Reactive	37.3	Positive	2.76	61.1879	63.6783	Indeterminant	-
40	Female	40	OTHER	11561	Reactive	412	Positive	7.04	400.8	225.012	Indeterminant	-
60	Male	60	WHITE	08853	Reactive	148	Positive	8.09	357.034	364.497	Positive	80
40	Female	40	ASIAN	08846	Reactive	652	Positive	5.28	339.188	226.726	Borderline	< LOD
30	Male	30	WHITE	07030	Reactive	932	Positive	3.81	649.727	192.813	Positive	160
40	Male	40	WHITE	07726	Reactive	234	Positive	2.61	169.823	209.183	Negative	< LOD
50	Female	50	WHITE		Reactive	297	Positive	3.78	428.383	209.468	Positive	80
40	Male	40	WHITE	11702	Reactive	384	Positive	6.4	450.201	481.223	Positive	80
40	Male	40	HISPANIC/LATINO	07065	Reactive	1000	Positive	9.47	1672.2	1533.78	Positive	640
30	Male	30	WHITE	10306	Reactive	199	Positive	1.79	187.803	147.828	Positive	80
20	Female	20	WHITE	11209	Reactive	320	Positive	2.23	180.876	170.097	Positive	80
50	Male	50	ASIAN	08863	Reactive	814	Positive	5.37	947.458	156.133	Positive	640
50	Male	50	ASIAN	11360	Reactive	1000	Positive	8.5	2334.17	1650.86	Positive	1280
50	Male	50	WHITE	11563	Reactive	249	Positive	5.03	434.764	329.037	Positive	160
50	Male	50	OTHER	11001	Reactive	927	Positive	6.6	1010.26	568.77	Positive	160
10	Male	10	MULTI RACE	10451	Reactive	464	Positive	2.31	214.668	111.795	Positive	160
20	Male	20	WHITE	11758	Reactive	241	Positive	2.81	240.202	72.2996	Positive	80
50	Female	50	BLACK	11433	Reactive	72.9	Positive	2.62	149.125	71.7804	Borderline	< LOD
40	Male	40	WHITE	11234	Reactive	328	Positive	1.47	165.727	81.6449	Indeterminant	-
20	Female	20	WHITE	11756	Reactive	1000	Positive	2.38	864.202	104.972	Positive	160
10	Female	10	WHITE	10305	Reactive	759	Positive	5.77	699.647	253.372	Positive	160
20	Male	20	HISPANIC/LATINO	10704	Reactive	462	Positive	1.65	236.241	55.155	Borderline	< LOD
20	Male	20	HISPANIC/LATINO	10970	Reactive	414	Positive	2.2	399.398	347.35	Positive	160
30	Male	30	WHITE	11704	Reactive	21.8	Positive	1.5	83.2469	21.1633	Indeterminant	-
30	Female	30	MULTI RACE	10473	Reactive	320	Positive	2.61	471.803	125.742	Positive	160
20	Female	20	WHITE	11530	Reactive	1000	Positive	3.36	870.396	127.119	Positive	160
50	Female	50	MULTIPLE RACE	11223	Reactive	1000	Positive	5.04	2751.96	165.054	Positive	640
20	Male	20	WHITE	12520	Reactive	627	Positive	7.68	860.214	413.346	Positive	160
40	Male	40	ASIAN	11421	Reactive	372	Positive	5.9	324.283	215.629	Positive	160
60	Female	60	N/A	10312	Reactive	626	Positive	5.89	1021.5	126.056	Positive	640
20	Female	20	WHITE	10305	Reactive	528	Positive	2.97	314.323	67.4895	Positive	160
30	Male	30	WHITE	11572	Reactive	218	Positive	1.65	99.8828	66.4903	Indeterminant	0
60	Male	60	WHITE	10467	Reactive	556	Positive	8.18	964.54	731.31	Positive	640
20	Male	20	WHITE	10307	Reactive	288	Positive	3.55	302.592	332.539	Positive	80
10	Male	10	WHITE	12477	Reactive	943	Positive	4.29	382.697	255.335	Positive	80
50	Male	50	WHITE	11741	Reactive	23	Negative	0.4	37.3877	16.1183	Negative	< LOD
30	Male	30	BLACK	10460	Reactive	488	Positive	5.01	593.302	173.385	Positive	80
20	Male	20	ASIAN	11426	Reactive	115	Positive	4.87	153.61	361.073	Positive	80
30	Male	30	WHITE	07002	Reactive	848	Positive	3.25	341.675	122.639	Positive	80
10	Female	10	ASIAN	08863	Reactive	832	Positive	6.7	379.319	200.765	Positive	320
20	Male	20	OTHER	11596	Reactive	422	Positive	4.53	178.416	125.613	Positive	80
30	Male	30	WHITE	07002	Reactive	664	Positive	4.45	593.153	158.112	Positive	80
30	Male	30	N/A	10314	Reactive	221	Positive	2.28	140.055	59.96	Positive	80
30	Male	30	WHITE	11714	Reactive	867	Positive	6.61	697.605	484.114	Positive	160
50	Male	50	WHITE	11581	Reactive	286	Positive	7.19	399.824	796.96	Positive	320
30	Male	30	HISPANIC/LATINO	11365	Reactive	780	Positive	5.21	415.084	1666.41	Positive	80
60	Male	60	WHITE	07090	Reactive	172	Positive	6.04	347.361	385.441	Positive	160
40	Female	40	ASIAN	11360	Reactive	358	Positive	4.33	352.088	1548.06	Positive	80
30	Female	30	WHITE	11554	Reactive	686	Positive	4.94	624.941	193.219	Positive	80
30	Male	30	BLACK	07103	Reactive	376	Positive	3.23	175.28	114.296	Borderline	< LOD
50	Female	50	WHITE	11023	Reactive	243	Positive	4.54	253.64	216.961	Positive	80
60	Female	60	WHITE	10314	Reactive	496	Positive	5.93	703.848	954.495	Positive	160
30	Female	30	OTHER	10314	Reactive	68.1	Positive	3.3	178.95	124.442	Borderline	< LOD
20	Male	20	WHITE	11691	Reactive	295	Positive	2.58	379.836	63.1151	Positive	160
60	Male	60	WHITE	12518	Reactive	435	Positive	4.02	690.143	2155.43	Positive	160
50	Male	50	WHITE	10941	Reactive	421	Positive	5.25	397.751	460.997	Positive	80
50	Male	50	MULTI RACE	12553	Reactive	699	Positive	4.13	266.604	133.356	Positive	80
20	Female	20	WHITE	07628	Reactive	28.1	Positive	2.23	75.8272	104.134	Negative	< LOD
30	Male	30	ASIAN	11357	Reactive	805	Positive	6.99	617.24	193.719	Positive	160
60	Male	60	OTHER	10956	Reactive	997	Positive	3.59	609.32	196.106	Positive	160
50	Female	50	WHITE	07010	Reactive	84.7	Positive	3.44	55.1642	478.212	Positive	80
50	Female	50	WHITE	10970	Reactive	518	Positive	4.01	1332.78	183.872	Positive	160
10	Female	10	HISPANIC/LATINO	10548	Reactive	1000	Positive	5.62	850.044	243.139	Positive	160
50	Male	50	HISPANIC/LATINO	11385	Reactive	701	Positive	6.71	614.35	243.628	Positive	320
50	Female	50	WHITE	11570	Reactive	95.6	Positive	2.69	78.9158	39.1444	Positive	160
20	Female	20	WHITE	11576	Reactive	1000	Positive	1.73	903.004	250.519	Positive	160
50	Female	50	WHITE	11545	Reactive	614	Positive	4.86	312.008	277.533	Positive	80
40	Female	40	WHITE	07450	Reactive	393	Positive	2.03	110.105	73.7075	Positive	160
50	Male	50	BLACK	11727	Reactive	1000	Positive	8.05	550.064	940.303	Positive	320
60	Female	60	WHITE	11757	Reactive	420	Positive	7.44	333.392	252.148	Positive	160
50	Female	50	WHITE	11967	Reactive	146	Positive	4.44	69.3575	140.366	Positive	160
20	Female	20	MULTI RACE	10977	Reactive	723	Positive	5.39	274.098	203.791	Positive	160
50	Female	50	WHITE	11530	Reactive	536	Positive	3.47	244.746	832.781	Positive	80
50	Female	50	WHITE	10541	Reactive	497	Positive	3.77	162.615	308.122	Positive	80
20	Female	20	WHITE	10314	Reactive	178	Positive	3.59	141.435	170.911	Positive	160
70	Male	70	WHITE	07630	Reactive	13.4	Positive	2.91	19.9967	762.341	Indeterminant	-
50	Female	50	WHITE	11757	Reactive	271	Positive	7.14	232.108	1144.48	Positive	80
50	Male	50	WHITE	11803	Reactive	619	Positive	4.02	395.481	204.15	Positive	80
30	Female	30	WHITE	11764	Reactive	610	Positive	5.09	346.845	361.37	Borderline	< LOD
60	Male	60	WHITE	11358	Reactive	60.8	Positive	6.64	91.6741	307.688	Positive	80
50	Male	50	WHITE	11375	Reactive	559	Positive	7.06	1298.63	779.516	Positive	320
60	Female	60	WHITE	10594	Reactive	420	Positive	3.84	340.155	332.608	Borderline	< LOD
30	Male	30	HISPANIC/LATINO	11432	Reactive	1000	Positive	8.15	1616.87	1730.51	Positive	640
50	Female	50	WHITE	11754	Reactive	43.4	Positive	5.97	106.203	574.854	Positive	80
50	Male	50	WHITE	10956	Reactive	596	Positive	7.63	382.663	1980.21	Positive	160
30	Male	30	WHITE	07724	Reactive	466	Positive	1.89	343.434	180.822	Positive	80
50	Male	50	OTHER	10024	Reactive	1000	Positive	7.48	1119.42	1996.35	Positive	320
40	Male	40	WHITE	07401	Reactive	598	Positive	7.95	769.549	2479.46	Positive	160
40	Female	40	HISPANIC/LATINO	11361	Reactive	773	Positive	4.68	392.382	274.996	Positive	160
20	Female	20	HISPANIC/LATINO	08904	Reactive	1000	Positive	4.1	821.913	320.953	Positive	160
50	Female	50	WHITE	11758	Reactive	833	Positive	4.77	723.945	1569.03	Positive	160
50	Female	50	WHITE	11001	Reactive	399	Positive	7.27	415.385	675.954	Positive	320
50	Male	50	WHITE	11757	Reactive	41.7	Positive	4.69	295.64	1075.32	Positive	80
40	Female	40	WHITE	11783	Reactive	423	Positive	3.56	223.015	239.85	Positive	80
20	Female	20	HISPANIC/LATINO	11746	Reactive	815	Positive	7.11	472.047	585.039	Positive	160
50	Male	50	WHITE	10023	Reactive	122	Positive	3.44	448.462	221.864	Positive	160
30	Male	30	HISPANIC/LATINO	07087	Reactive	400	Positive	2.64	213.888	393.008	Borderline	< LOD
10	Male	10	HISPANIC/LATINO	11218	Reactive	449	Positive	3.03	179.949	298.266	Positive	80
10	Male	10	HISPANIC/LATINO	10977	Reactive	741	Positive	2.78	612.654	717.592	Positive	160
40	Female	40	WHITE	10976	Non Reactive	0.2	Positive	4.31	29.9718	116.06	Positive	80
20	Male	20	BLACK	10710	Non Reactive	0.03	Positive	3	104.041	60.8578	Negative	< LOD
70	Female	70	N/A	11427	Non Reactive	0.06	Positive	2.97	13.2129	22.6938	Negative	< LOD
30	Male	30	WHITE	11542	Non Reactive	0.07	Positive	1.93	15.0489	50.5056	Indeterminant	-
20	Male	20	N/A	07075	Non Reactive	0.08	Positive	2.27	42.9235	29.6878	Indeterminant	-
40	Male	40	WHITE	11758	Non Reactive	0.75	Positive	1.49	128.296	136.65	Negative	< LOD
20	Male	20	WHITE	07410	Non Reactive	0.05	Positive	1.46	10.1142	21.8178	Negative	< LOD
20	Female	20	WHITE	11105	Reactive	127	Negative	0.66	307.048	155.635	Positive	160
40	Male	40	WHITE	08824	Reactive	70.2	Negative	0.47	115.454	47.7567	Positive	80
60	Female	60	WHITE	10314	Reactive	27.4	Negative	1.1	200.697	127.648	Negative	< LOD
30	Male	30	HISPANIC/LATINO	10033	Reactive	143	Negative	0.79	72.4307	52.792	Negative	< LOD
20	Male	20	HISPANIC/LATINO	11568	Reactive	1	Negative	0.05	39.1534	38.1123	Negative	< LOD
40	Female	40	WHITE	10989	Reactive	3.86	Negative	0.19	45.5458	21.0295	Negative	< LOD
50	Female	50	WHITE	11510	Reactive	155	Negative	0.67	109.819	48.8038	Positive	80
30	Female	30	HISPANIC/LATINO	11358	Reactive	56.5	Negative	0.65	111.138	179.052	Positive	80
30	Male	30	WHITE	11754	Reactive	9.1	Negative	0.05	17.8489	11.6545	Indeterminant	-
30	Male	30	WHITE	11758	Reactive	10.1	Negative	0.48	88.3317	24.1586	Indeterminant	-
50	Male	50	WHITE	11714	Reactive	105	Negative	0.8	75.7469	54.5138	Borderline	< LOD
20	Male	20	HISPANIC/LATINO	11783	Reactive	127	Negative	0.54	94.1736	68.0802	Negative	< LOD
20	Female	20	WHITE	08540	Reactive	1.17	Negative	0.03	46.2937	21.6975	Negative	< LOD
30	Male	30	WHITE	11758	Reactive	2.19	Negative	0.13	32.6004	15.3676	Negative	< LOD
30	Female	30	WHITE	10566	Reactive	79.5	Negative	0.33	89.9205	49.7427	Positive	80
20	Male	20	WHITE	11234	Reactive	216	Negative	0.17	175.648	43.97	Negative	< LOD
30	Male	30	HISPANIC/LATINO	08859	Reactive	80.7	Negative	1.11	73.3076	29.1941	Borderline	< LOD
30	Female	30	HISPANIC/LATINO	11561	Reactive	88.7	Negative	1.06	102.707	46.5696	Negative	< LOD
50	Male	50	WHITE	10956	Non Reactive	0.05	Negative	0.01	14.0018	14.5639	Negative	< LOD
40	Male	40	HISPANIC/LATINO	07644	Non Reactive	0.16	Negative	0.02	17.3184	22.4669	Negative	< LOD
30	Female	30	WHITE	10314	Non Reactive	0.15	Negative	0.03	5.53123	19.5463	Negative	< LOD
60	Female	60	WHITE	10303	Non Reactive	0.12	Negative	0.02	20.8315	155.646	Negative	< LOD
20	Female	20	WHITE	11801	Non Reactive	0.05	Negative	0.05	24.05	28.5312	Negative	< LOD
50	Male	50	WHITE	11784	Non Reactive	0.05	Negative	0.02	19.9169	24.7507	Negative	< LOD
50	Female	50	WHITE	11766	Non Reactive	0.02	Negative	0.02	182.771	73.6988	Negative	< LOD
50	Female	50	WHITE	10986	Non Reactive	0.05	Negative	0.01	3.51823	39.9443	Negative	< LOD
50	Female	50	WHITE	07661	Non Reactive	0.14	Negative	0.02	19.5885	13.8446	Negative	< LOD
60	Male	60	WHITE	08873	Non Reactive	0.24	Negative	0.02	30.0336	28.6484	Negative	< LOD
40	Male	40	ASIAN	08901	Non Reactive	0.11	Negative	0.01	108.817	49.3665	Negative	< LOD
40	Male	40	WHITE	11725	Non Reactive	0.04	Negative	0.05	39.5302	31.312	Negative	< LOD
20	Male	20	WHITE	11557	Non Reactive	0.07	Negative	0.03	14.1222	9.86957	Negative	< LOD
30	Male	30	HISPANIC/LATINO	08901	Non Reactive	0.2	Negative	0.01	62.0164	24.7673	Negative	< LOD
20	Female	20	WHITE	11756	Non Reactive	0.09	Negative	0.03	23.3478	16.9616	Negative	< LOD
40	Male	40	ASIAN	10034	Non Reactive	0.09	Negative	0.01	0	9.86098	Negative	< LOD
20	Male	20	ASIAN	11004	Non Reactive	0.1	Negative	0.03	19.4334	13.5494	Negative	< LOD
50	Female	50	WHITE	11572	Non Reactive	0.05	Negative	0.29	0	38.0874	Negative	< LOD
30	Male	30	HISPANIC/LATINO	11368	Non Reactive	0.13	Negative	0.02	19.782	20.3062	Negative	< LOD
40	Male	40	WHITE	11501	Non Reactive	0.26	Negative	0.15	15.7065	30.2535	Negative	< LOD
20	Female	20	HISPANIC/LATINO	10605	Non Reactive	0.06	Negative	0.02	52.4879	39.4521	Negative	< LOD
40	Male	40	ASIAN	11577	Non Reactive	0.15	Negative	0.07	16.7542	24.3273	Negative	< LOD
30	Female	30	WHITE	11718	Non Reactive	0.08	Negative	0.03	28.0315	23.4398	Negative	< LOD
30	Male	30	WHITE	11518	Non Reactive	0.09	Negative	0.06	50.2804	41.3693	Negative	< LOD
40	Male	40	WHITE	11694	Non Reactive	0.15	Negative	0.14	17.2762	19.3814	Negative	< LOD
40	Female	40	HISPANIC/LATINO	11435	Non Reactive	0.04	Negative	0.01	36.5743	9.34723	Negative	< LOD
40	Male	40	WHITE	11561	Non Reactive	0.06	Negative	0.03	17.813	6.83745	Negative	< LOD
10	Female	10	ASIAN	08817	Non Reactive	0.05	Negative	0.02	15.6766	13.013	Negative	< LOD
30	Female	30	HISPANIC/LATINO	11570	Non Reactive	0.09	Negative	0.01	49.788	43.2646	Negative	< LOD
50	Male	50	WHITE	11757	Non Reactive	0.03	Negative	0.02	72.2263	78.715	Negative	< LOD
40	Male	40	WHITE	11783	Non Reactive	0.04	Negative	0.05	26.7128	14.089	Negative	< LOD
30	Male	30	WHITE	10701	Non Reactive	0.03	Negative	0.12	34.142	35.788	Negative	< LOD
20	Female	20	WHITE	11001	Non Reactive	0.08	Negative	0.02	44.0417	17.5265	Negative	< LOD
40	Male	40	WHITE	11209	Non Reactive	0.08	Negative	0.03	35.4356	17.1307	Negative	< LOD
30	Female	30	WHITE	11542	Non Reactive	0.24	Negative	0.01	83.5564	65.6776	Negative	< LOD
40	Male	40	WHITE	07730	Non Reactive	0.2	Negative	0.37	38.986	29.8842	Negative	< LOD
50	Male	50	WHITE	11510	Non Reactive	0.13	Negative	0.13	84.3674	73.6421	Negative	< LOD
60	Male	60	WHITE	10502	Non Reactive	0.06	Negative	0.02	1.06291	11.9162	Negative	< LOD
50	Female	50	WHITE	11558	Non Reactive	0.05	Negative	0.02	99.9208	89.748	Negative	< LOD
30	Male	30	HISPANIC/LATINO	10704	Non Reactive	0.05	Negative	0.07	60.7	29.9601	Negative	< LOD
20	Male	20	HISPANIC/LATINO	10465	Non Reactive	0.06	Negative	0.02	20.2616	7.08347	Negative	< LOD
50	Female	50	WHITE	11758	Non Reactive	0.08	Negative	0.01	2.01747	4.79945	Negative	< LOD
20	Female	20	HISPANIC/LATINO	07735	Non Reactive	0.08	Negative	0.05	83.7272	27.4569	Negative	< LOD
50	Female	50	WHITE	11580	Non Reactive	0.04	Negative	0.02	41.6021	8.9854	Negative	< LOD
20	Female	20	WHITE	11743	Non Reactive	0.04	Negative	0.01	74.4092	24.8988	Negative	< LOD
30	Male	30	WHITE	11566	Non Reactive	0.06	Negative	0.03	32.4524	15.5226	Negative	< LOD
30	Male	30	HISPANIC/LATINO	07747	Non Reactive	0.03	Negative	0.03	5.23095	9.00402	Negative	< LOD
20	Male	20	WHITE	08096	Non Reactive	0.02	Negative	0.05	0	5.22497	Negative	< LOD
50	Female	50	WHITE	11566	Non Reactive	0.08	Negative	0.02	2.41519	7.49144	Negative	< LOD
50	Male	50	WHITE	11704	Non Reactive	0.12	Negative	0.03	21.5008	21.2539	Negative	< LOD
70	Female	70	WHITE	10710	Non Reactive	0.07	Negative	0.01	11.5951	13.1097	Negative	< LOD
50	Male	50	HISPANIC/LATINO	10567	Non Reactive	0.19	Negative	0.02	0	3.96993	Negative	< LOD
40	Male	40	HISPANIC/LATINO	07033	Non Reactive	0.04	Negative	0.02	19.6384	12.5648	Negative	< LOD
30	Male	30	BLACK	07063	Non Reactive	0.04	Negative	0.06	11.3933	34.7221	Negative	< LOD
50	Male	50	WHITE	08876	Non Reactive	0.13	Negative	0.04	27.8613	19.0128	Negative	< LOD
40	Male	40	WHITE	11793	Non Reactive	0.1	Negative	0.04	0.389616	20.779	Negative	< LOD
30	Male	30	WHITE	10310	Non Reactive	0.1	Negative	0.01	12.6544	18.4804	Negative	< LOD
30	Male	30	WHITE	07734	Non Reactive	0.05	Negative	0.05	3.71667	8.28392	Negative	< LOD
10	Male	10	MULTI RACE	10523	Non Reactive	0.09	Negative	0.03	25.4715	12.0912	Negative	< LOD
20	Male	20	WHITE	07730	Non Reactive	0.19	Negative	0.07	51.5449	21.098	Negative	< LOD
50	Female	50	WHITE	11201	Non Reactive	0.09	Negative	0.04	25.5794	19.4398	Negative	< LOD
30	Male	30	HISPANIC/LATINO	11756	Non Reactive	0.12	Negative	0.03	22.7354	14.3712	Negative	< LOD
40	Female	40	HISPANIC/LATINO	11701	Non Reactive	0.15	Negative	0.09	105.071	92.2228	Negative	< LOD
20	Female	20	WHITE	10306	Non Reactive	0.1	Negative	0.02	32.4491	29.9005	Negative	< LOD
40	Female	40	ASIAN	07069	Non Reactive	0.11	Negative	0.01	14.0011	10.1596	Negative	< LOD
60	Female	60	BLACK	07103	Non Reactive	0.08	Negative	0.02	5.20476	14.2095	Negative	< LOD
50	Female	50	WHITE	07974	Non Reactive	0.05	Negative	0.01	32.1318	40.2055	Negative	< LOD
60	Male	60	WHITE	07105	Non Reactive	0.1	Negative	0.12	13.1061	16.9066	Negative	< LOD
20	Female	20	#N/A	07417	#N/A	#N/A	#N/A	#N/A	n/a	#VALUE!	Negative	< LOD
60	Male	60	#N/A	10956	#N/A	#N/A	#N/A	#N/A	n/a	#VALUE!	Negative	< LOD
30	Male	30	WHITE	10309	Non Reactive	0.05	Negative	0.04	32.0703	75.8169	Negative	< LOD
50	Female	50	MULTIPLE RACE	10312	Non Reactive	0.05	Negative	0.02	13.5168	13.7211	Negative	< LOD
30	Female	30	OTHER	11235	Non Reactive	0.04	Negative	0.01	0	36.4221	Negative	< LOD
30	Male	30	WHITE	10306	Non Reactive	0.12	Negative	0.04	0	42.4726	Negative	< LOD
60	Female	60	WHITE	10314	Non Reactive	0.09	Negative	0.01	0	8.44271	Negative	< LOD
20	Female	20	WHITE	10302	Non Reactive	0.12	Negative	0.02	0	7.85004	Negative	< LOD
40	Female	40	BLACK	11412	Non Reactive	0.13	Negative	0.01	5.35136	11.6302	Negative	< LOD
30	Male	30	WHITE	07062	Non Reactive	0.09	Negative	0.03	5.95507	14.0225	Negative	< LOD
40	Female	40	ASIAN	11411	Non Reactive	0.14	Negative	0.03	53.8866	71.0511	Negative	< LOD
60	Female	60	WHITE	11432	Non Reactive	0.14	Negative	0.01	0	5.79407	Negative	< LOD
50	Female	50	WHITE	11030	Non Reactive	0.28	Negative	0.03	3.79678	15.7372	Negative	< LOD
40	Male	40	HISPANIC/LATINO	10460	Non Reactive	0.04	Negative	0.01	6.63212	12.0074	Negative	< LOD
30	Female	30	#N/A	11106	#N/A	#N/A	#N/A	#N/A	n/a	#VALUE!	Negative	< LOD
40	Female	40	#N/A	10977	#N/A	#N/A	#N/A	#N/A	n/a	#VALUE!	Negative	< LOD
40	Female	40	#N/A	07424	#N/A	#N/A	#N/A	#N/A	n/a	#VALUE!	Negative	< LOD
50	Male	50	OTHER	11791	Non Reactive	0.08	Negative	0.02	28.6254	15.7406	Negative	< LOD
40	Male	40	HISPANIC/LATINO	11367	Non Reactive	0.09	Negative	0.01	5.1764	6.23941	Negative	< LOD
60	Male	60	WHITE	10023	Non Reactive	0.07	Negative	0.02	50.9786	38.4788	Negative	< LOD
50	Female	50	WHITE	07010	Non Reactive	0.35	Negative	0.01	23.4352	13.4988	Negative	< LOD
20	Male	20	WHITE	10965	Non Reactive	0.06	Negative	0.03	26.7725	21.8916	Negative	< LOD
40	Male	40	WHITE	11706	Non Reactive	0.05	Negative	0.02	43.9793	24.1954	Negative	< LOD
20	Female	20	#N/A	08904	#N/A	#N/A	#N/A	#N/A	n/a	#VALUE!	Negative	< LOD
30	Female	30	HISPANIC/LATINO	11756	Non Reactive	0.09	Negative	0.01	31.6734	29.2955	Negative	< LOD
50	Male	50	WHITE	11757	Non Reactive	0.07	Negative	0.02	22.6841	58.5274	Negative	< LOD
30	Female	30	WHITE	07043	Non Reactive	0.09	Negative	0.02	13.0408	15.563	Negative	< LOD
20	Female	20	WHITE	14136	Non Reactive	0.04	Negative	0.03	19.6188	9.2236	Negative	< LOD
40	Female	40	WHITE	11729	Non Reactive	0.05	Negative	0.07	22.683	17.0392	Negative	< LOD
20	Male	20	HISPANIC/LATINO	11001	Non Reactive	0.06	Negative	0.07	43.0955	18.7191	Negative	< LOD
20	Male	20	WHITE		Non Reactive	0.14	Negative	0.1	0	38.8564	Negative	< LOD
50	Male	50	WHITE	10965	Non Reactive	0.13	Negative	0.03	37.335	31.6642	Negative	< LOD
40	Male	40	BLACK	07652	Non Reactive	0.08	Negative	0.12	38.6035	15.7592	Negative	< LOD
40	Female	40	WHITE	10924	Non Reactive	0.07	Negative	0.01	0	10.0788	Negative	< LOD
20	Male	20	HISPANIC/LATINO	10987	Non Reactive	0.14	Negative	0.01	50.5859	30.3933	Negative	< LOD
